# Supplementary material
Source: publisher site journal article supplement (https://www.dovepress.com/get_supplementary_file.php?f=270398.docx)
Supplement: Supplementary file 1 [file get_supplementary_file.php]

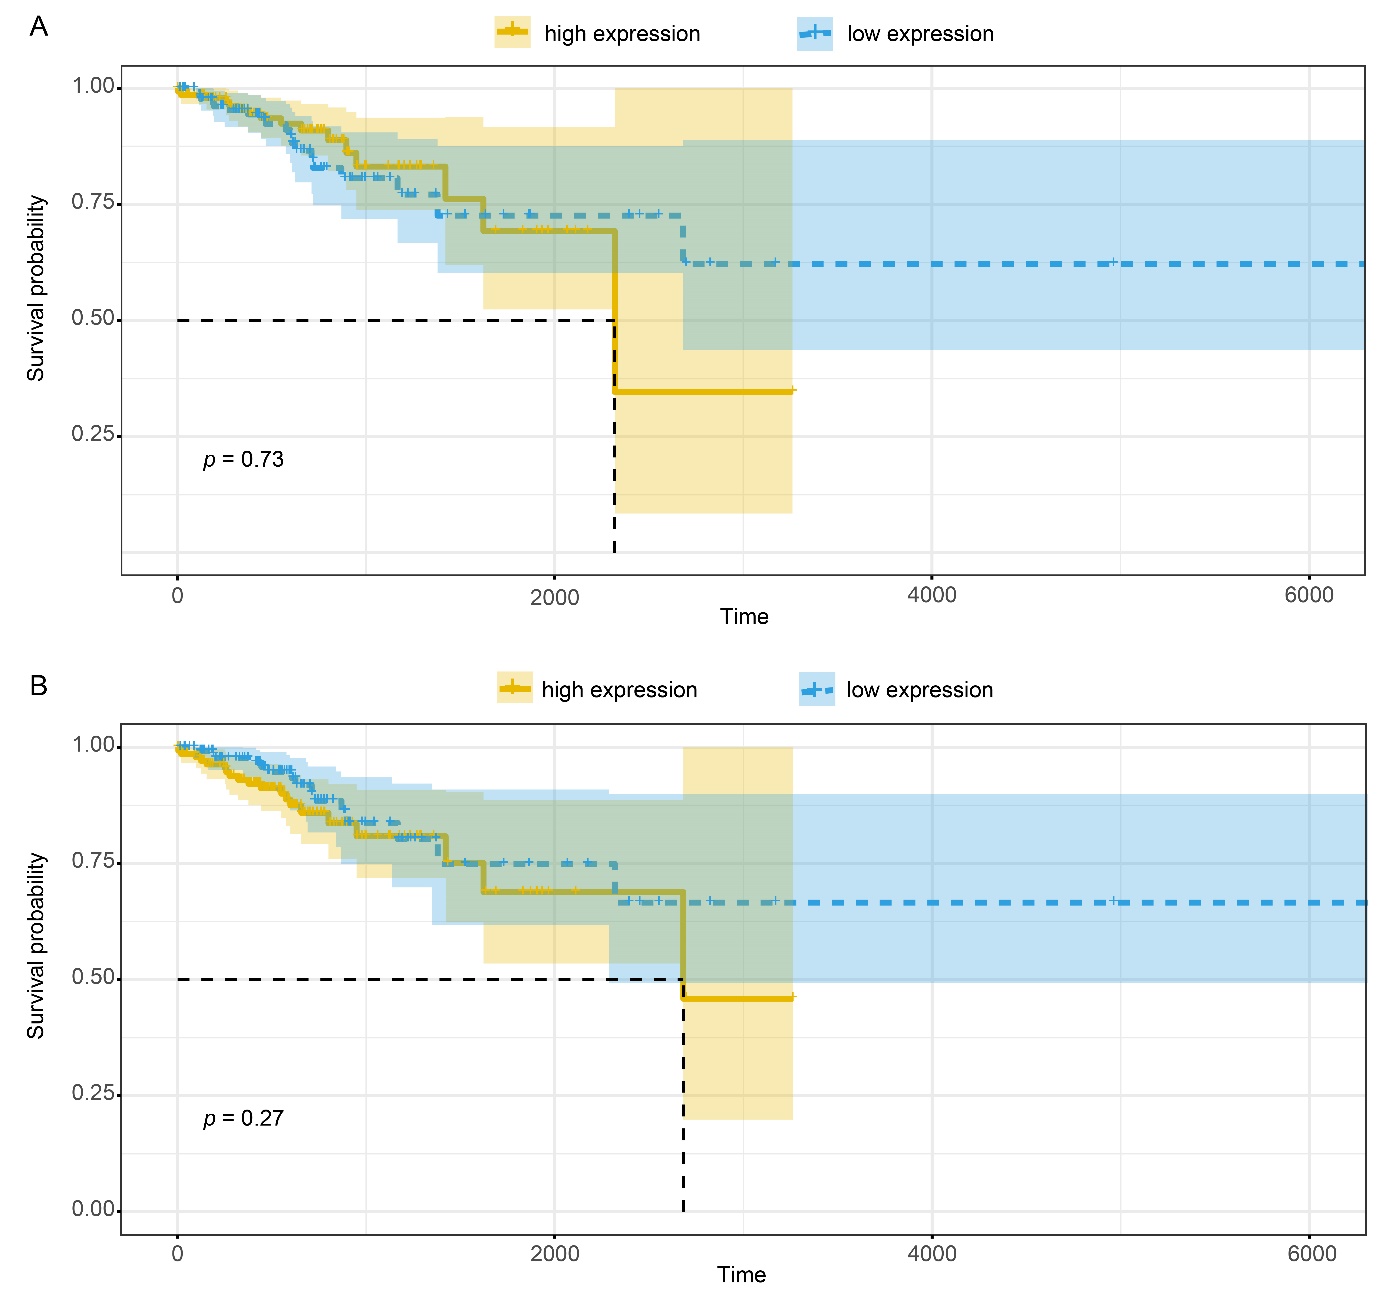


**Figure S1: Kaplan-Meier analysis of DSG3(A) and KRT14(B) in LUAD samples in TCGA database.** The high expression level of DSG3 and KRT14 had no connection with the prognosis in LUAD samples. (*P* > 0.05)
